# Supplementary material
Source: PubMed Central journal article supplement (PMC1895968)

**A**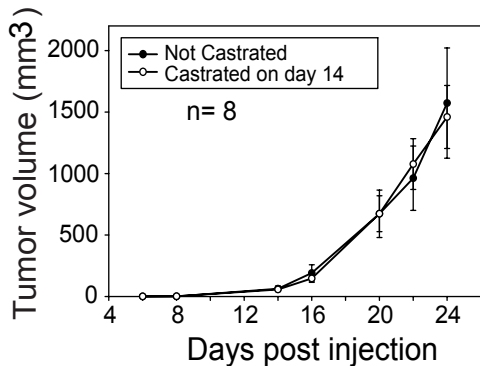**B**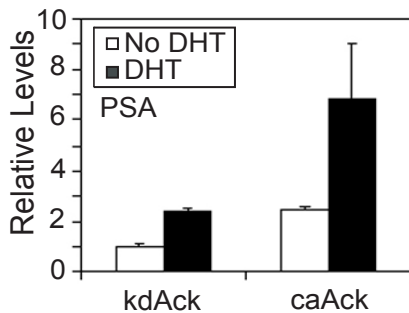**C**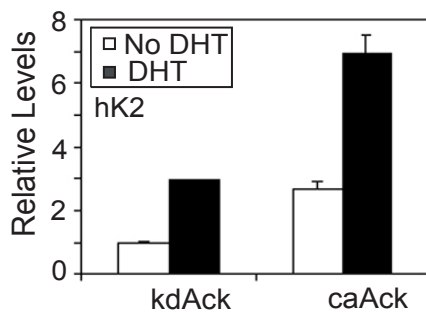

Supplement: pnas_0700420104_1.pdf [file pnas_0700420104_1.pdf]

**A**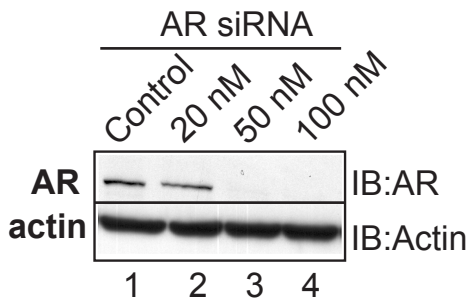**B**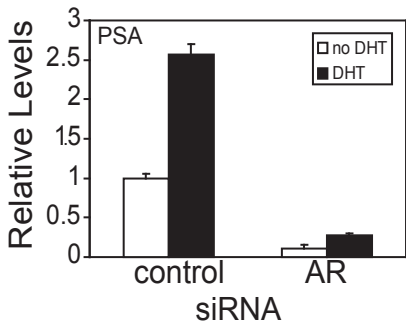**C**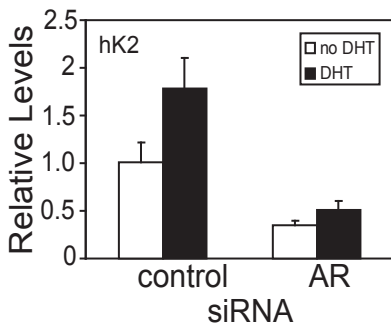

Supplement: pnas_0700420104_2.pdf [file pnas_0700420104_2.pdf]

AICaP

ADCaP

BPH

21 22 23 24 25 26 21 22 23 24 25 21 22 23 24 25

**p-AR**

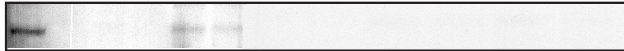

IP:AR, IB:pTyr

**AR**

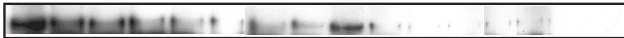

IP:AR, IB:AR

**Actin**

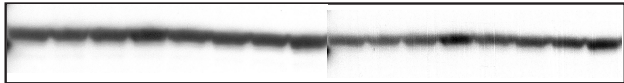

IB:Actin

Supplement: pnas_0700420104_3.pdf [file pnas_0700420104_3.pdf]

**A**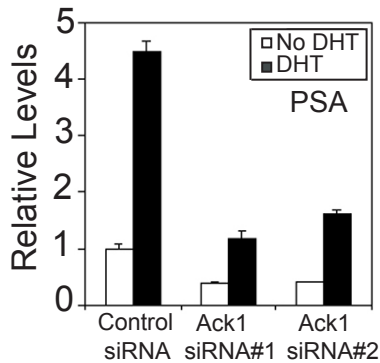**B**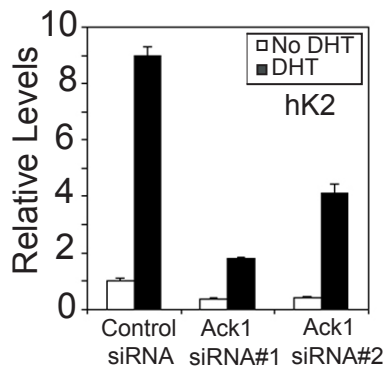**C**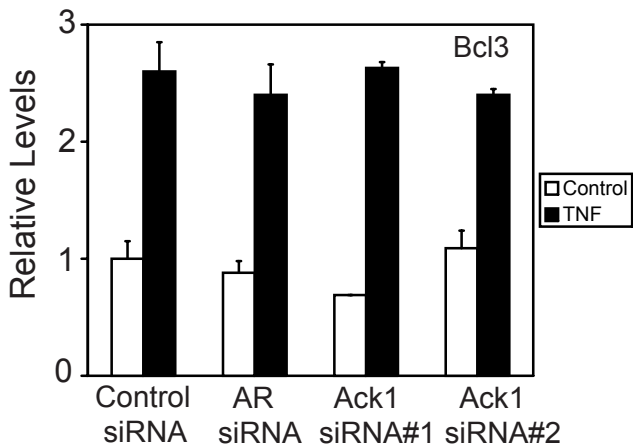

Supplement: pnas_0700420104_4.pdf [file pnas_0700420104_4.pdf]

**A**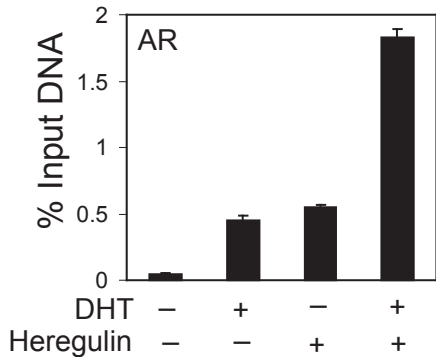**B**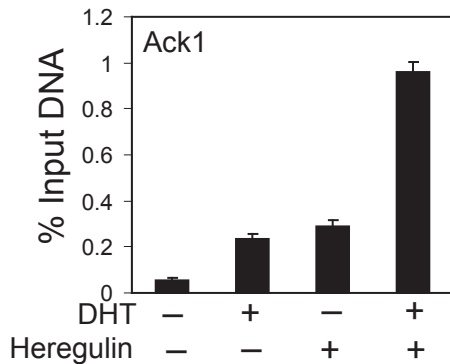**C**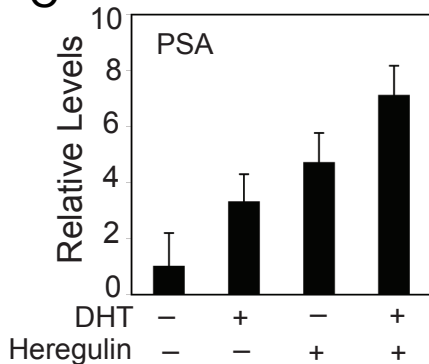**D**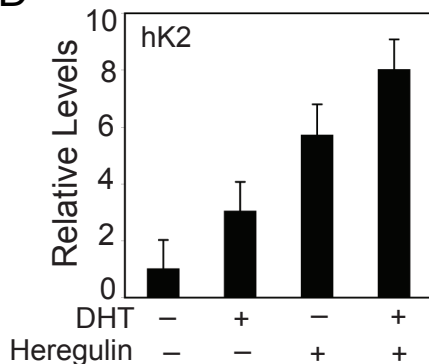

Supplement: pnas_0700420104_5.pdf [file pnas_0700420104_5.pdf]

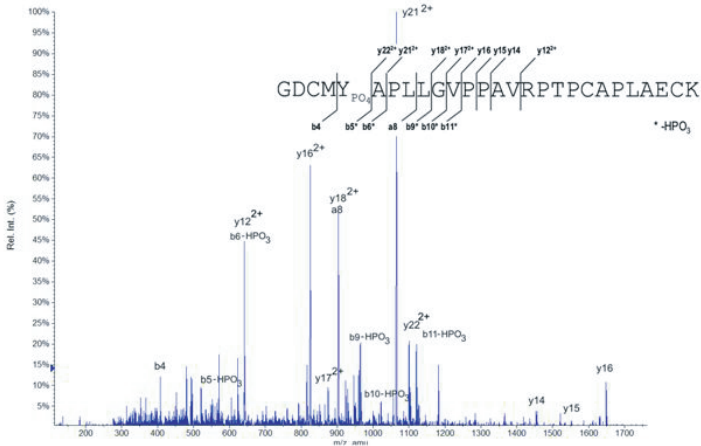

Supplement: pnas_0700420104_6.pdf [file pnas_0700420104_6.pdf]
